# Supplementary material for: A novel broken-gap chemical-bonded SiC/Ti2CO2 heterojunction with band to band tunneling: first-principles investigation
Source: Royal Society of Chemistry journal article supplement (doi:10.1039/d3cp03273f), 2023-01-01
Supplement: d3cp03273f1.pdf [file d3cp03273f1.pdf]

## Supporting Information

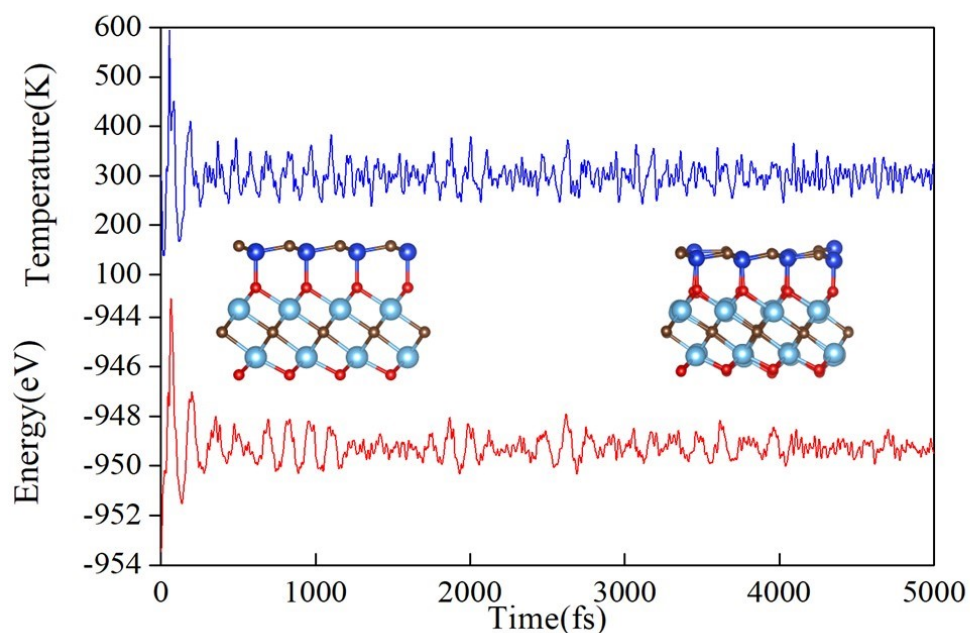

Fig. S1 The result of AI configuration molecular dynamics simulation with time, the structure has slightly deformation after heating

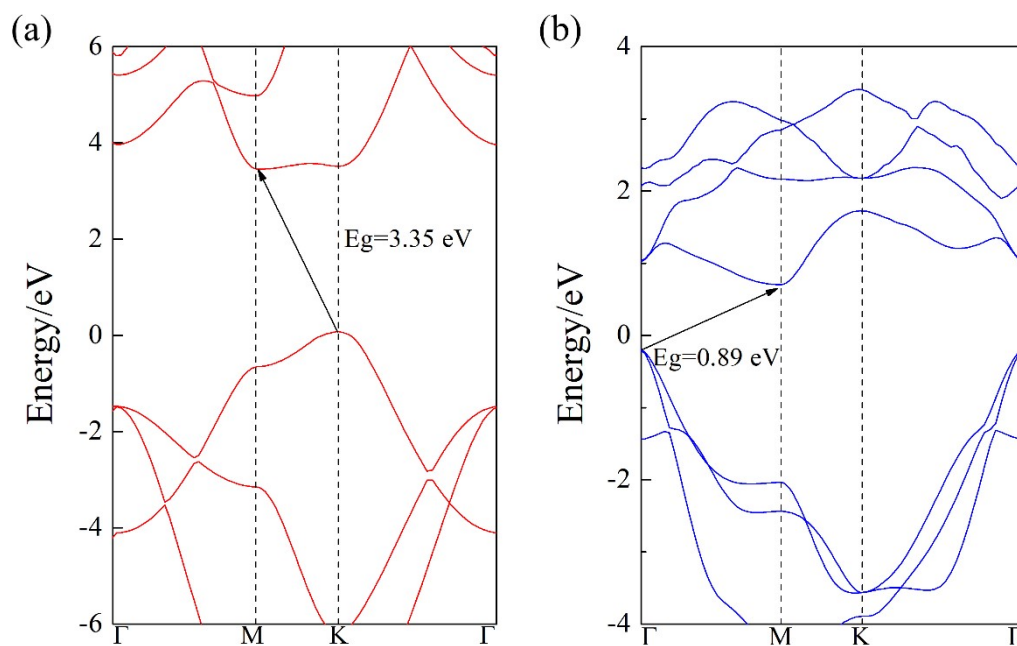

Fig. S2 The projected band structures of SiC (a) and  $\text{Ti}_2\text{CO}_2$  (b) monolayers

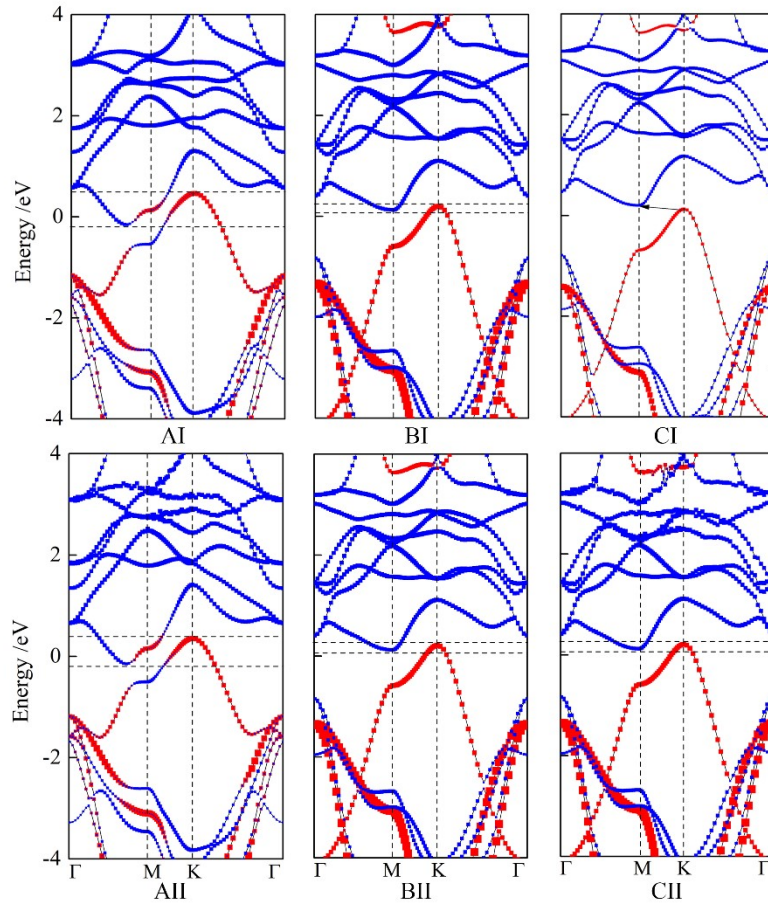

Fig. S3 The projected band structures of SiC/Ti<sub>2</sub>CO<sub>2</sub> heterojunction under different configuration, in which SiC is the red line and Ti<sub>2</sub>CO<sub>2</sub> is the blue line.

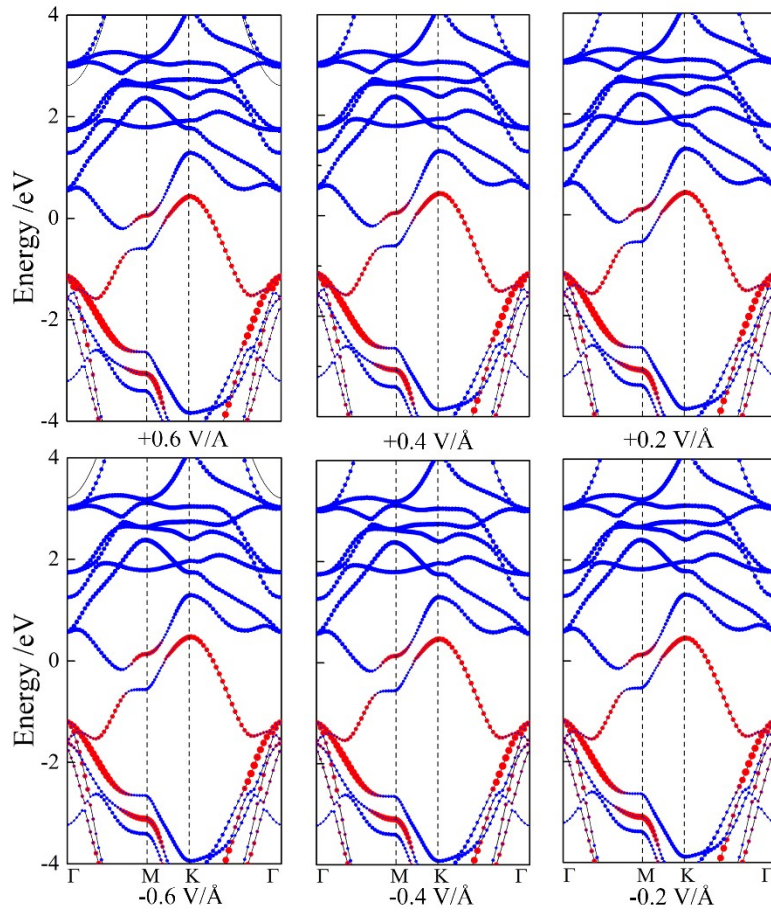

Fig. S4 The projected band structures of SiC/Ti<sub>2</sub>CO<sub>2</sub> heterojunction under external electric field, in which SiC is the red line and Ti<sub>2</sub>CO<sub>2</sub> is the blue line.

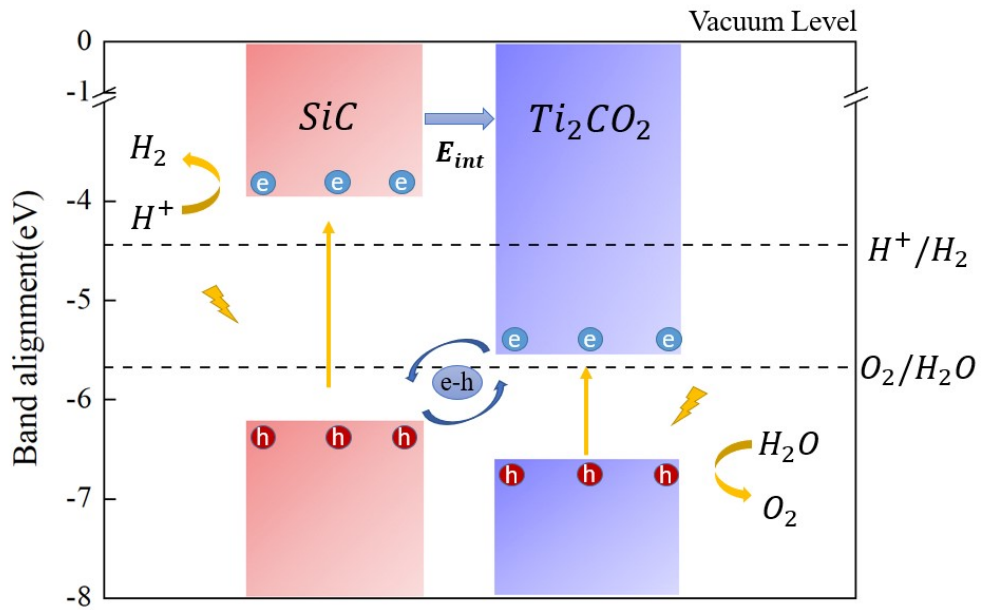

Fig. S5 The type-II band alignment of SiC/Ti<sub>2</sub>CO<sub>2</sub> heterojunction under the strain of 3% to 6%

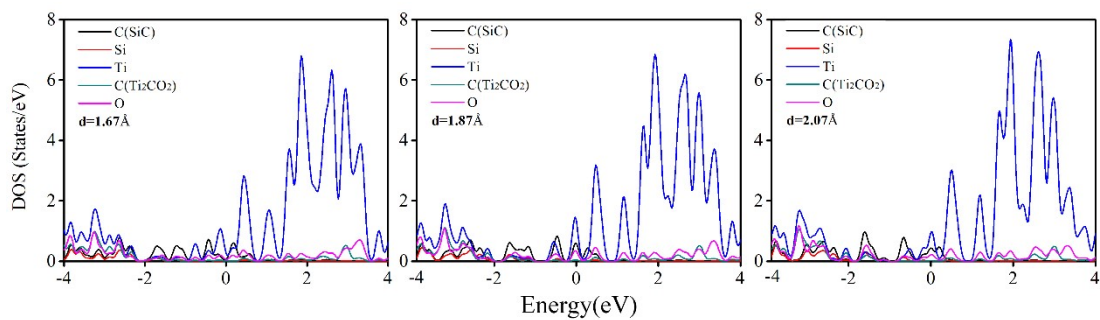

Fig. S6 The density of states (DOS) of SiC/Ti<sub>2</sub>CO<sub>2</sub> heterojunction under the interlayer spacing (d) from 1.67 to 2.07 Å

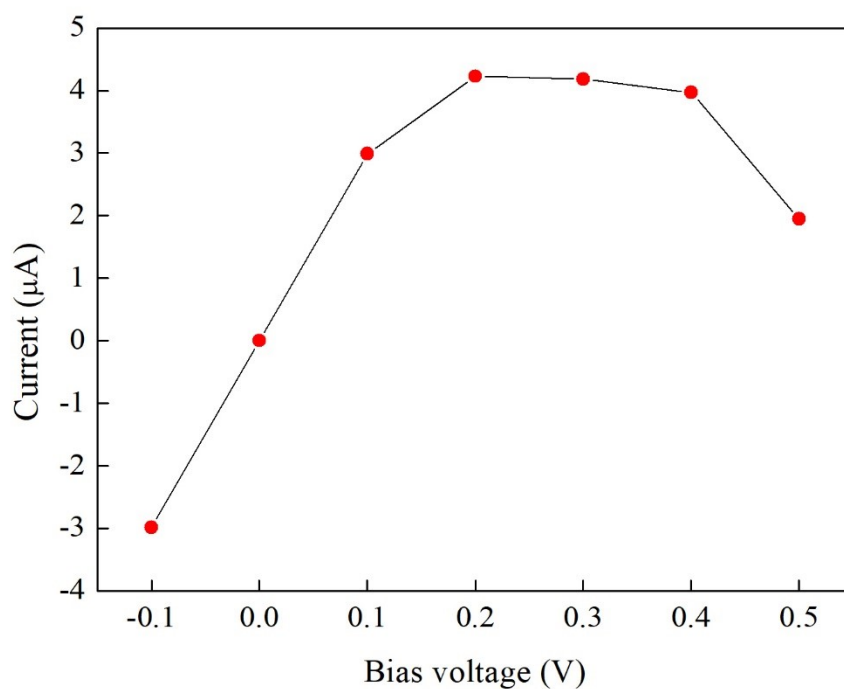

Fig. S7 The I-V curve for the SiC/Ti<sub>2</sub>CO<sub>2</sub> heterojunction at an interlayer distance of 3.37 Å
